# Supplementary material for: Erythrocyte sphingosine kinase regulates intraerythrocytic development of Plasmodium falciparum
Source: PubMed Central journal article supplement (PMC7806667; doi:10.1038/s41598-020-80658-7), 2021-01-13
Supplement: 41598_2020_80658_MOESM1_ESM.pdf [file 41598_2020_80658_MOESM1_ESM.pdf]

# Erythrocyte Sphingosine Kinase Regulates Intraerythrocytic Development of *Plasmodium falciparum*

Raj Kumar Sah<sup>1#</sup>, Soumya Pati<sup>2#</sup>, Monika Saini<sup>1-2</sup> and Shailja Singh<sup>1\*</sup>

<sup>1</sup>Special Centre for Molecular Medicine, Jawaharlal Nehru University, New Delhi, India

<sup>2</sup>Department of Life Sciences, School of Natural Sciences, Shiv Nadar University, Greater Noida, India

## \*Correspondence:

Shailja Singh

[shailja.jnu@gmail.com](mailto:shailja.jnu@gmail.com)

[shailja.singh@jnu.ac.in](mailto:shailja.singh@jnu.ac.in)

Key words: Sphingosine, Sphingosine-1-phosphate, Sphingosine kinase Erythrocyte, plasmodium, malaria

**A)**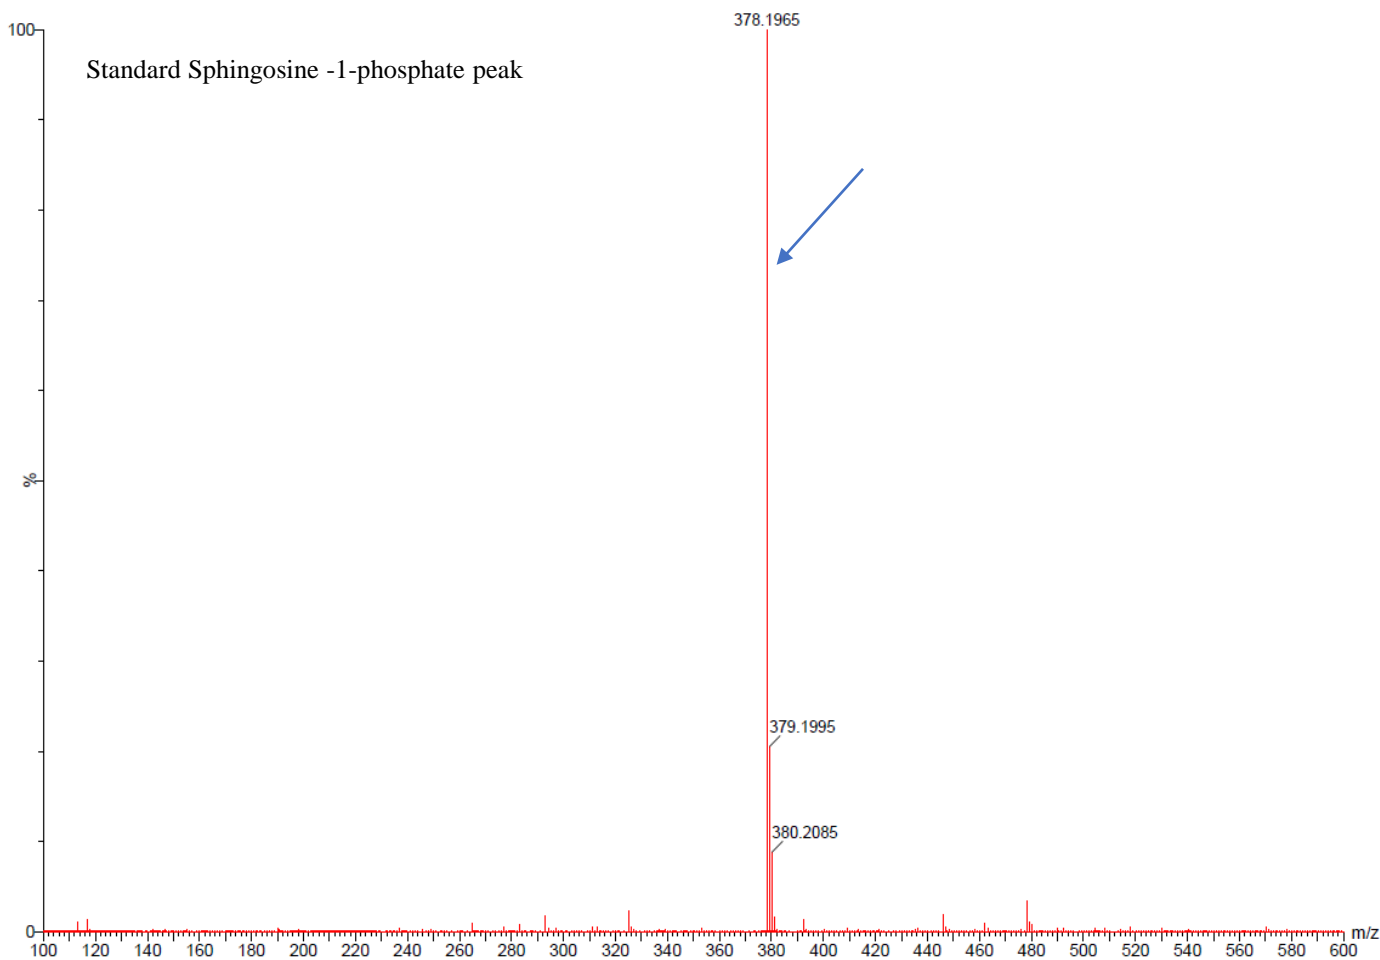**B)**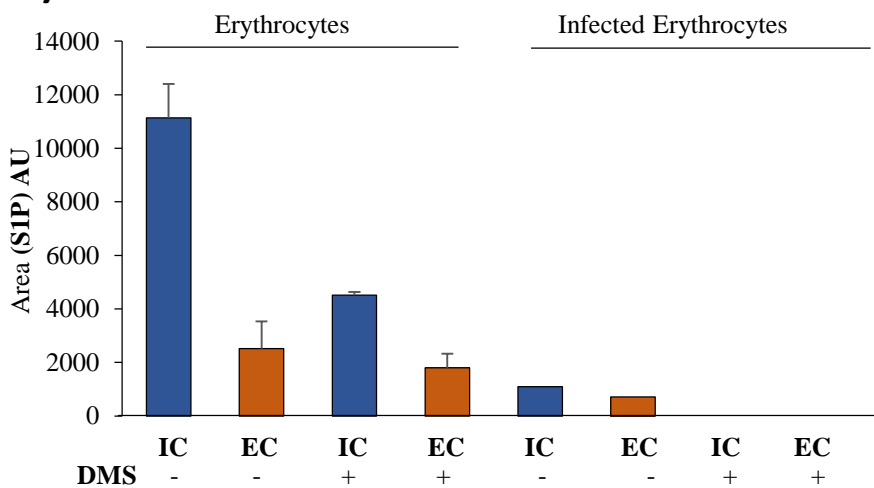

**Supplementary Figure 1. Characteristic peak of S1P in MS spectra.** S1P in methanol was subjected to LC/MS analysis and generated a characteristic peak at position 378.16 acquired in MS spectra (A). Representative bar graphs display LC/MS-based quantification of intracellular (IC) and extracellular (EC) S1P levels in parasite infected and uninfected erythrocytes in presence of DMS (14  $\mu$ M). Acquired S1P-specific peak highlighted in the MS spectra (B).

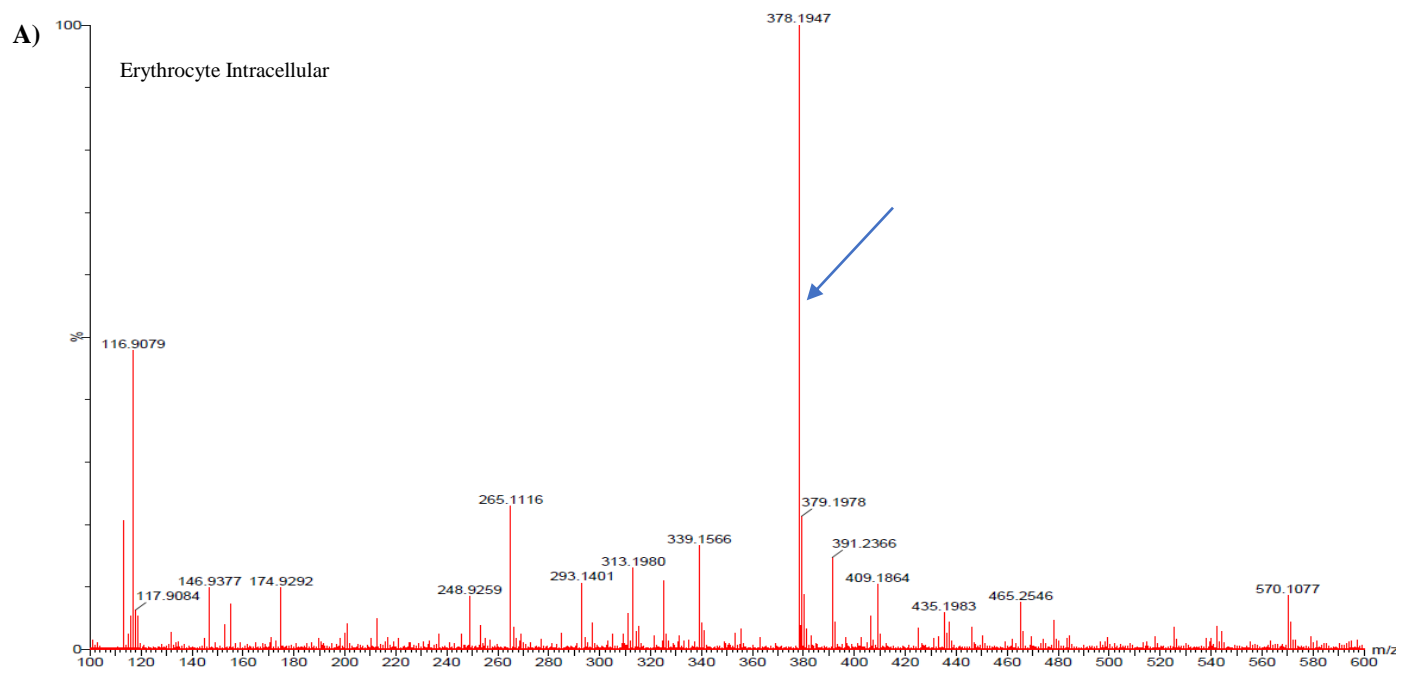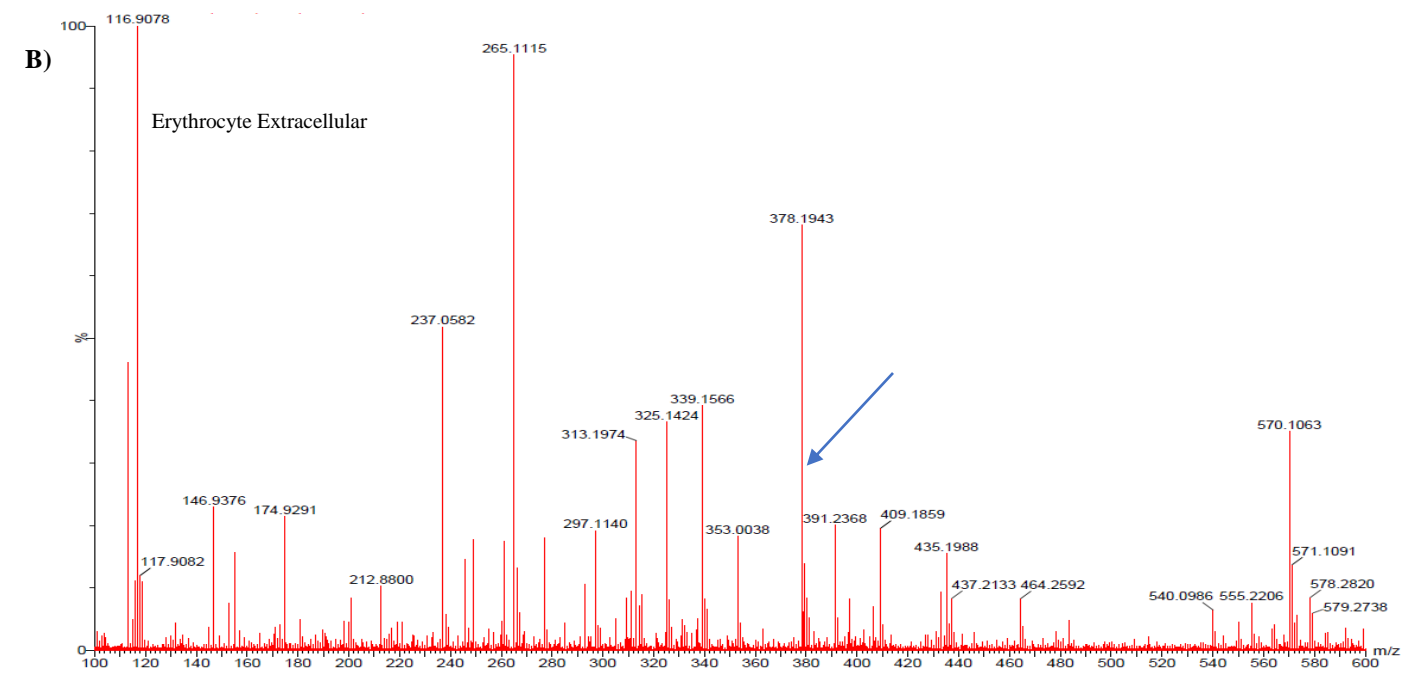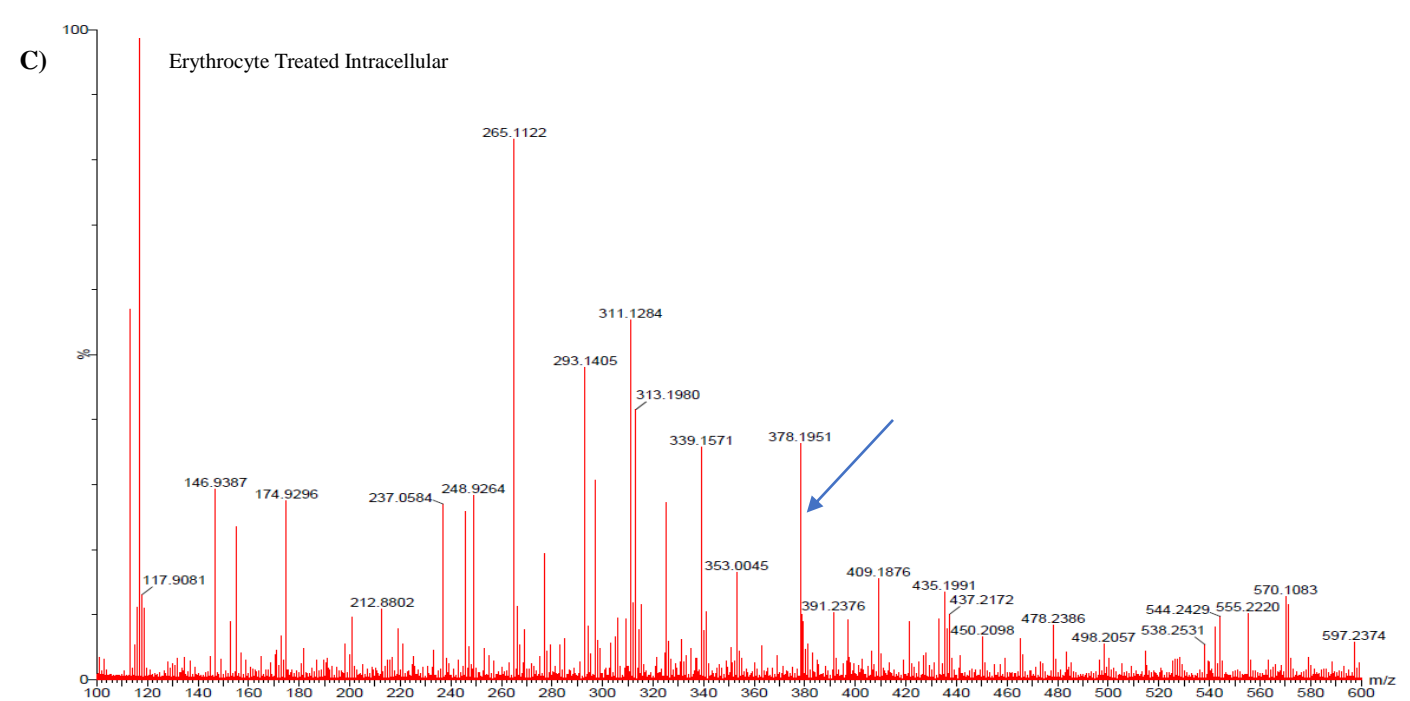

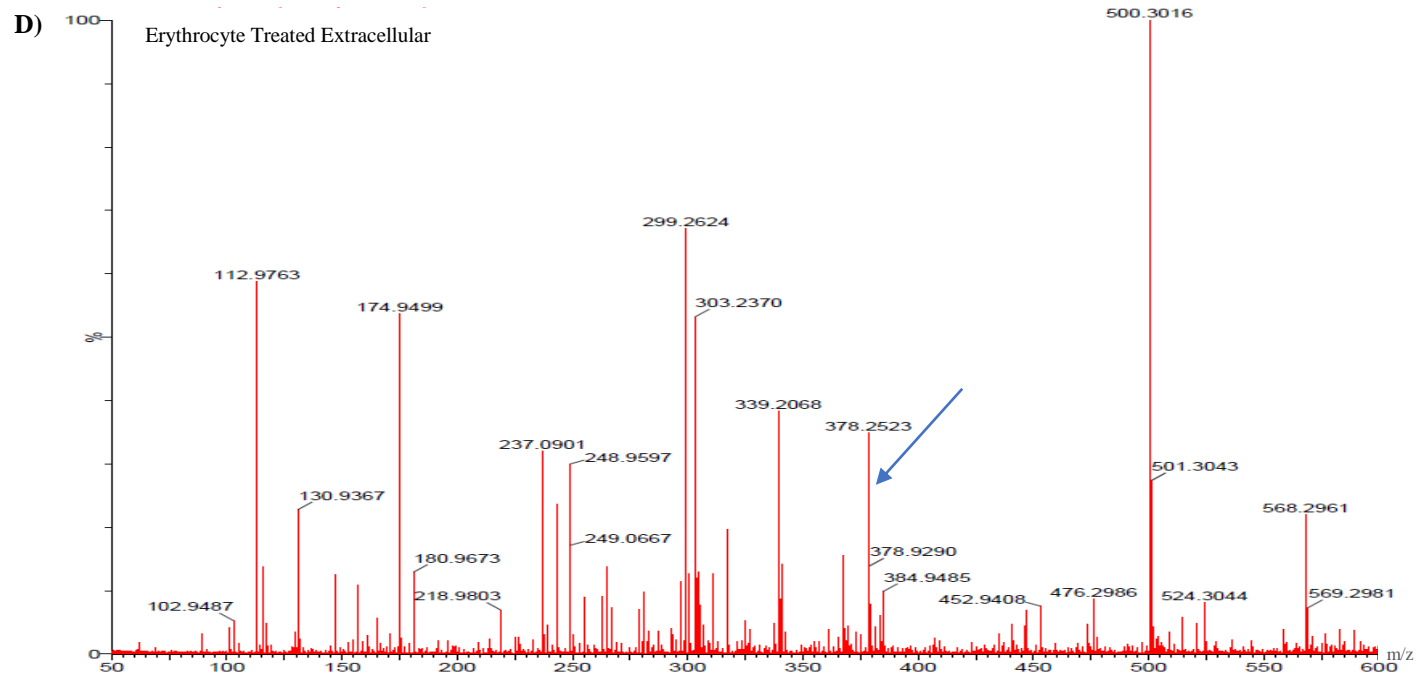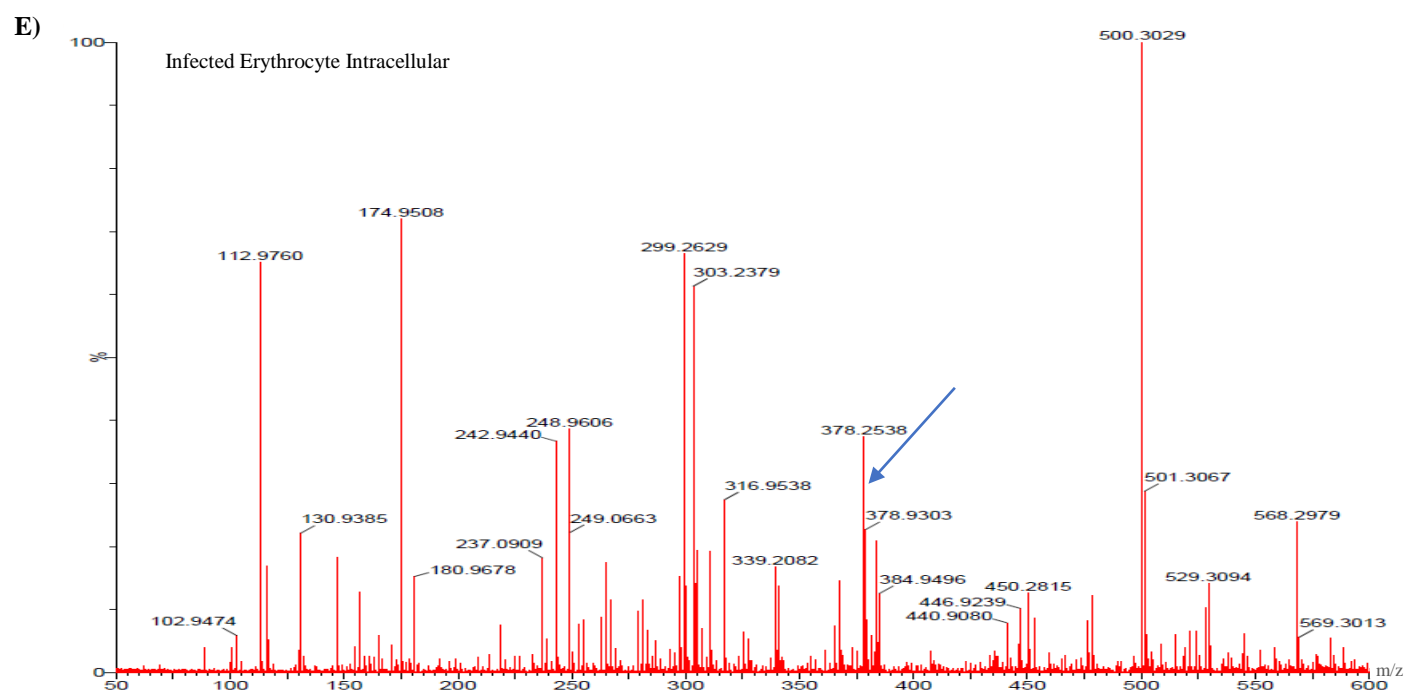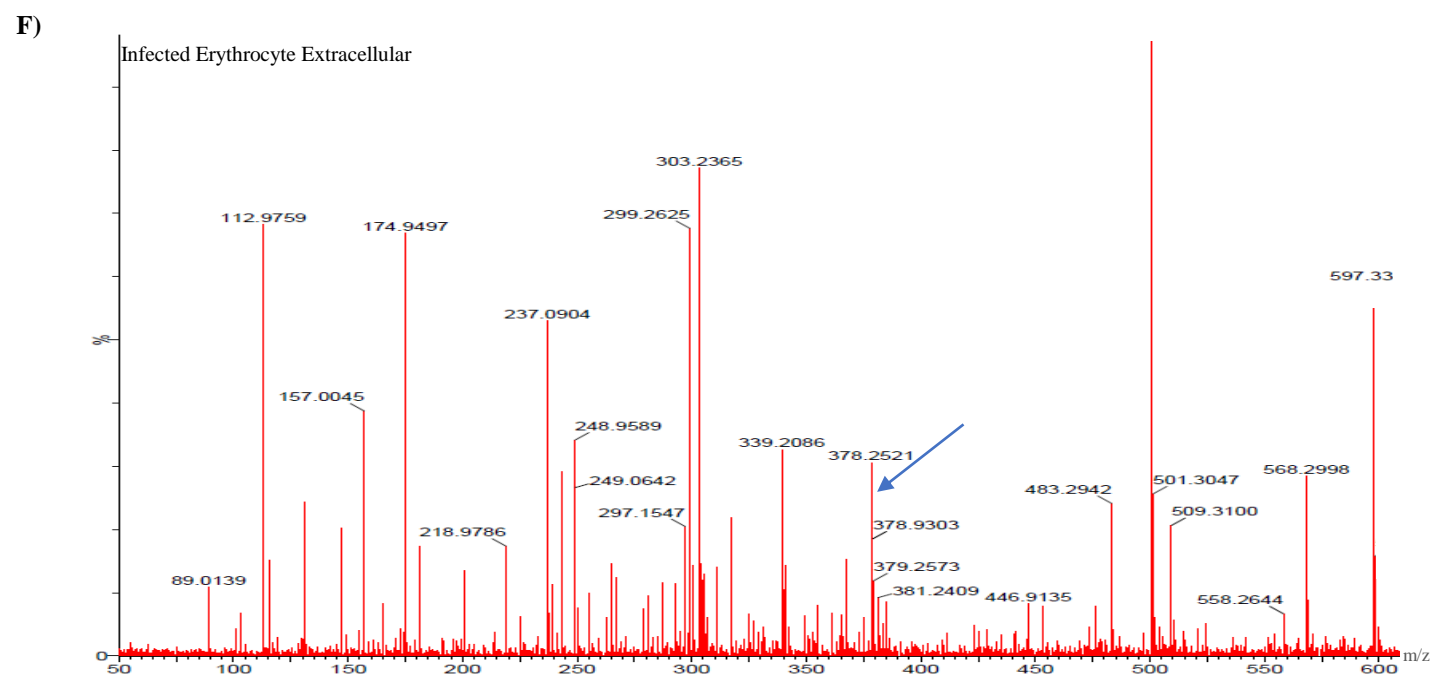

**G)**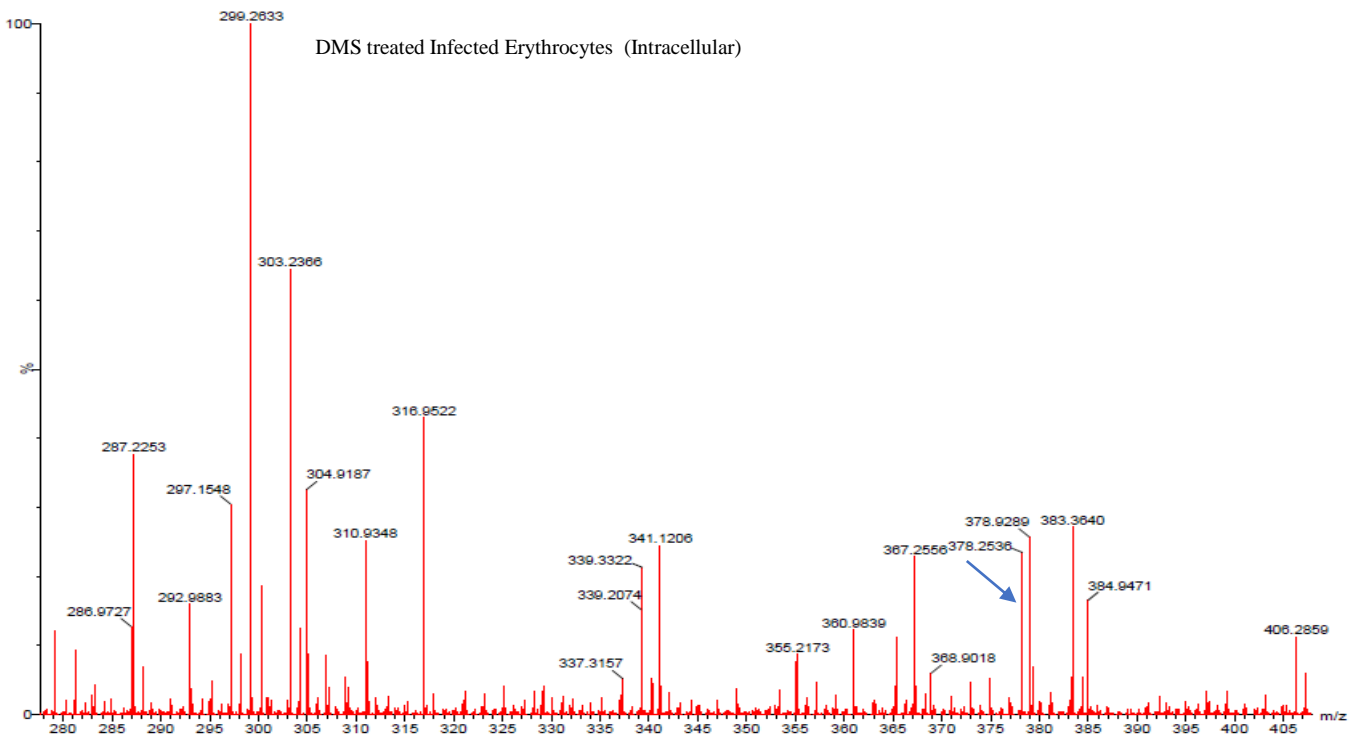**H)**

Infected Erythrocyte Treated  
Extracellular Not Detected (Because  
of very low level)

**Supplementary Figure 2. S1P detection in IC and EC milieu of uninfected erythrocytes and infected erythrocyte with DMS treatment and without treatment.** Lipids were extracted from supernatant and lysed cells from uninfected erythrocytes and infected erythrocyte after DMS treatment and without treatment. The extracted lipids were subjected to LC/MS analysis for S1P detection. S1P characteristic peaks were detected at position 378.25 in the MS spectra for IC as well as EC milieu (A-G). In **Figure 2 (H)** Due to lower level of S1P in DMS treated cells, peak was not detected.

A)

Infected and Un-infected Erythrocytes

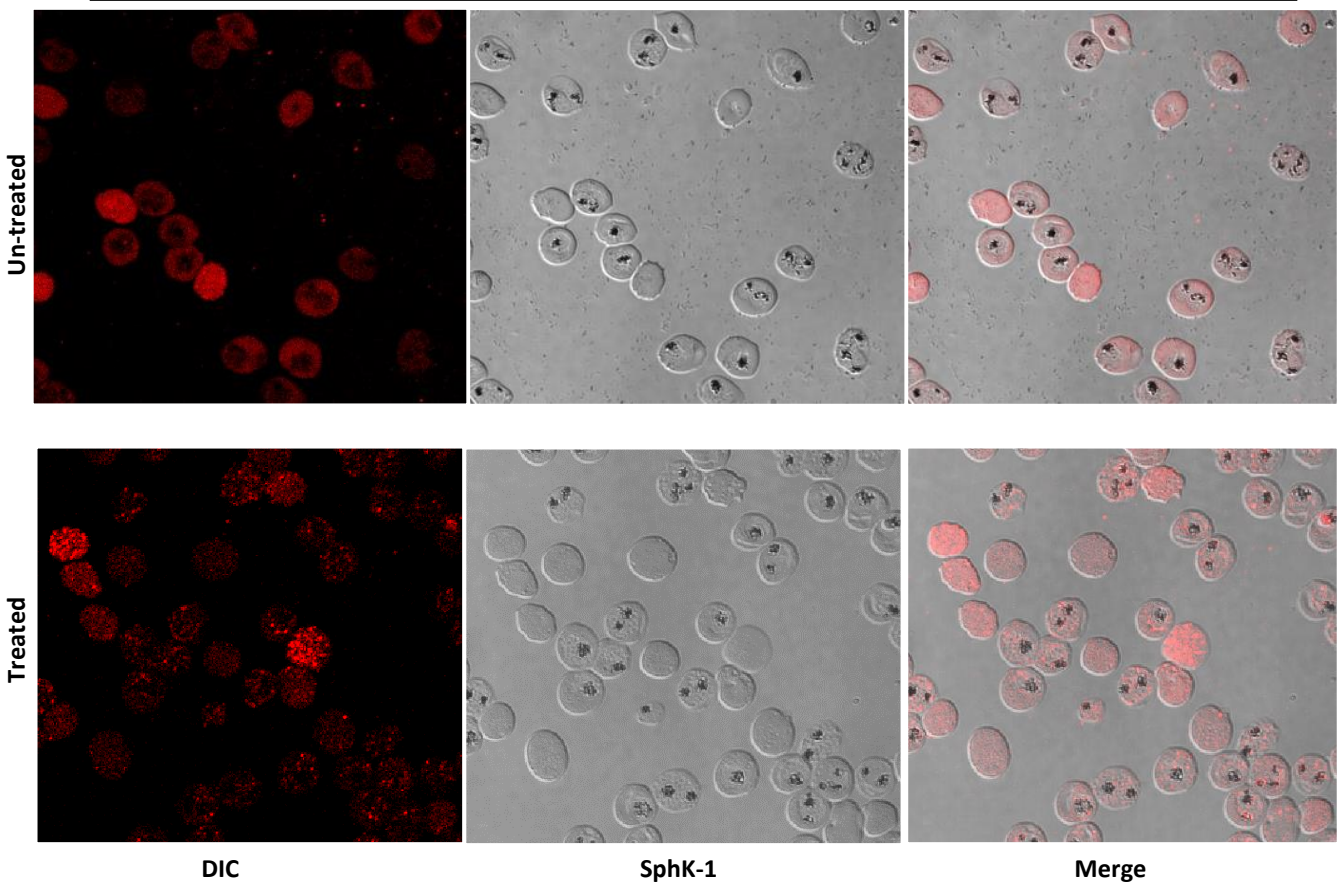

**Supplementary Figure 3. Inhibition of host SphK-1 by specific inhibitor DMS causes decrease in SphK-1 protein level and phosphorylation. A) Confocal micrographs demonstrate altered host SphK-1 level in mixed-stage parasite culture following treatment with DMS (14  $\mu$ M).**

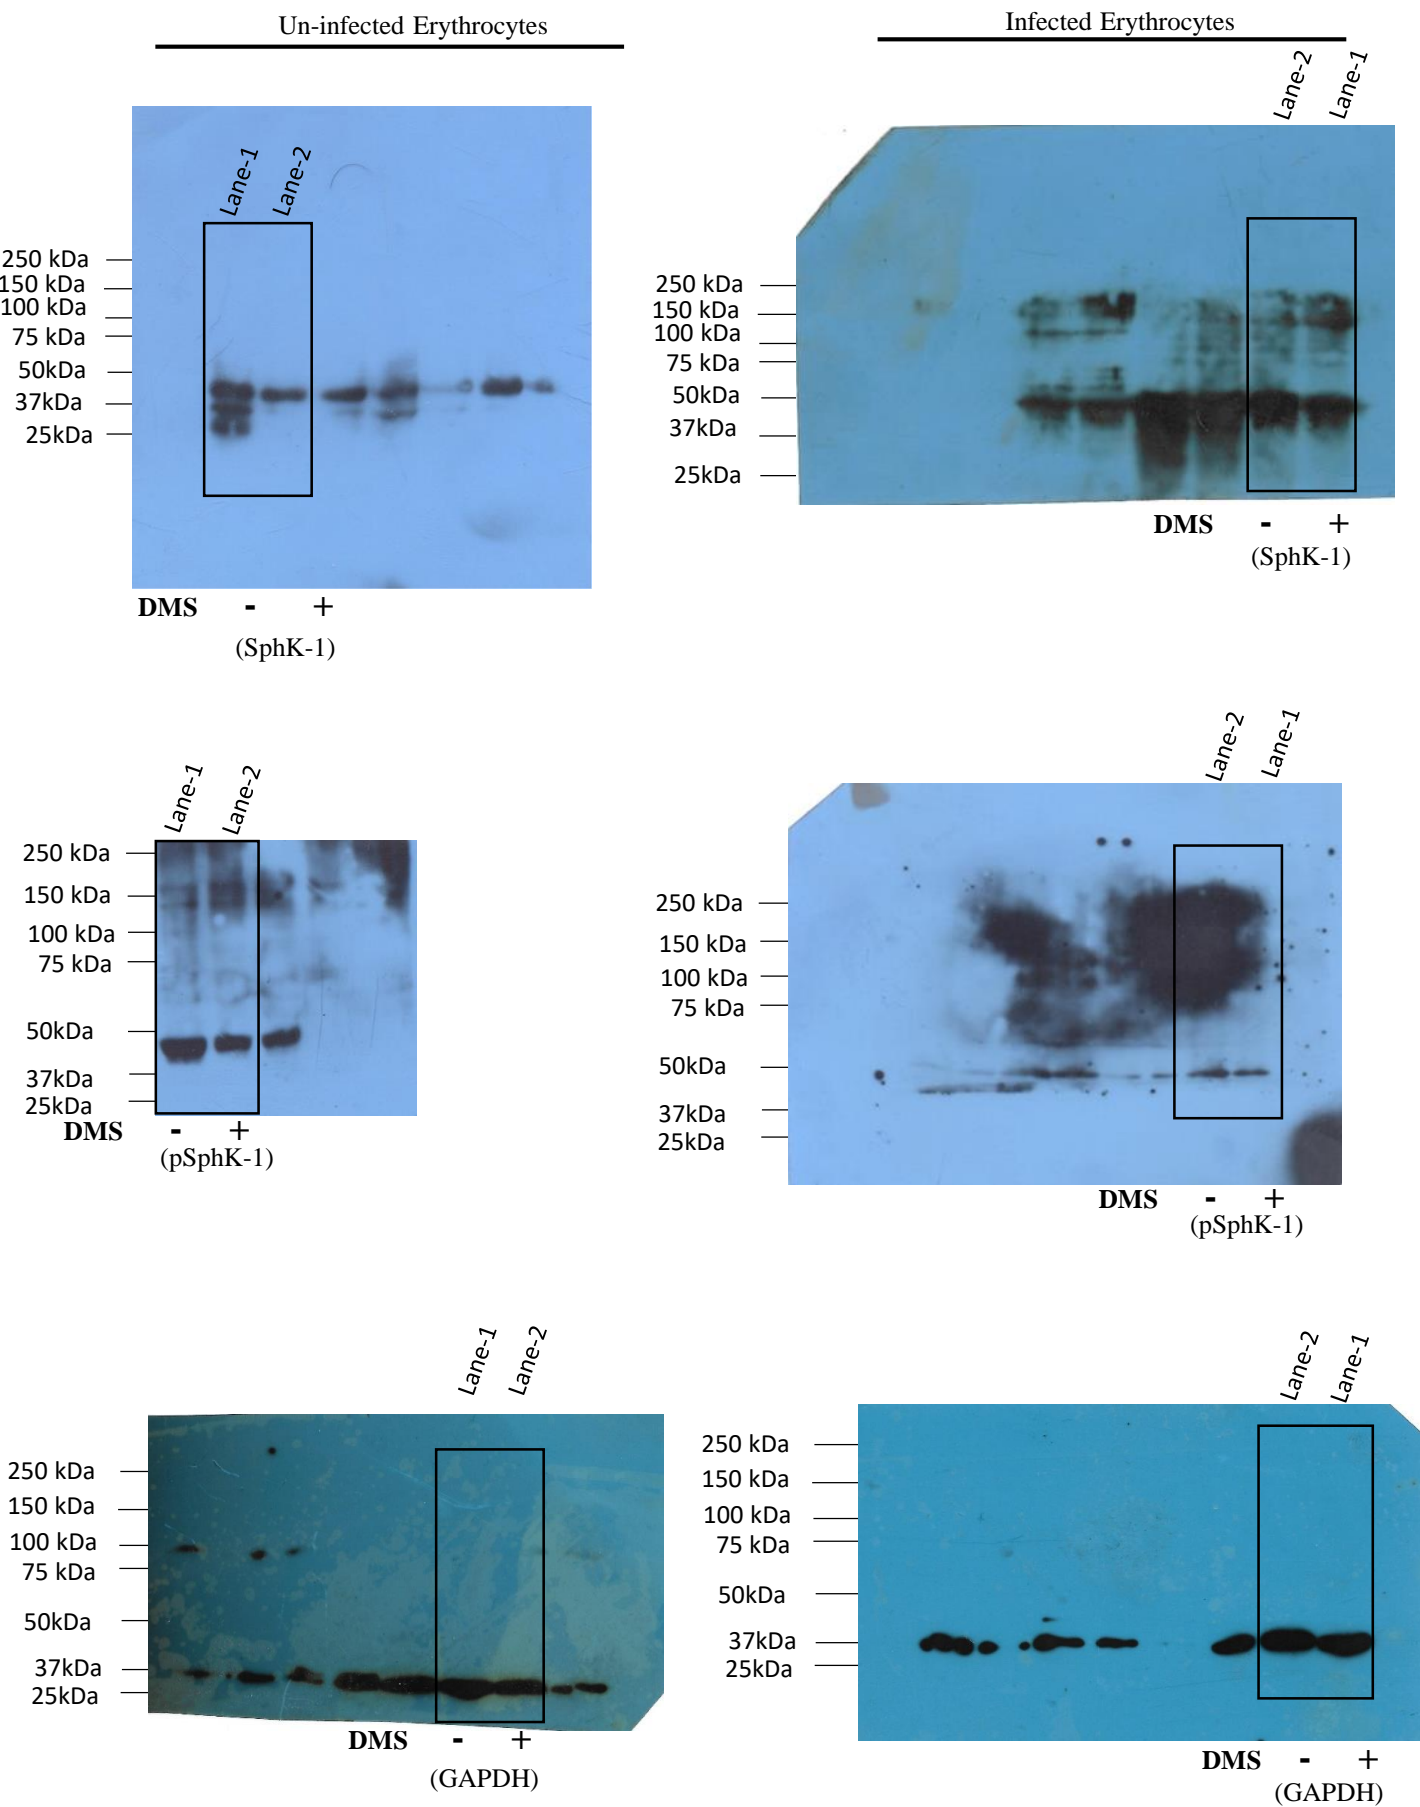

**Supplementary Figure 4. Inhibition of host SphK-1 by specific inhibitor DMS causes decrease in SphK-1 protein level and phosphorylation.** The phosphorylation status of SphK-1 and its level were evaluated by immunoblotting. Total cell lysates probed with GAPDH was used as a loading control.

A)

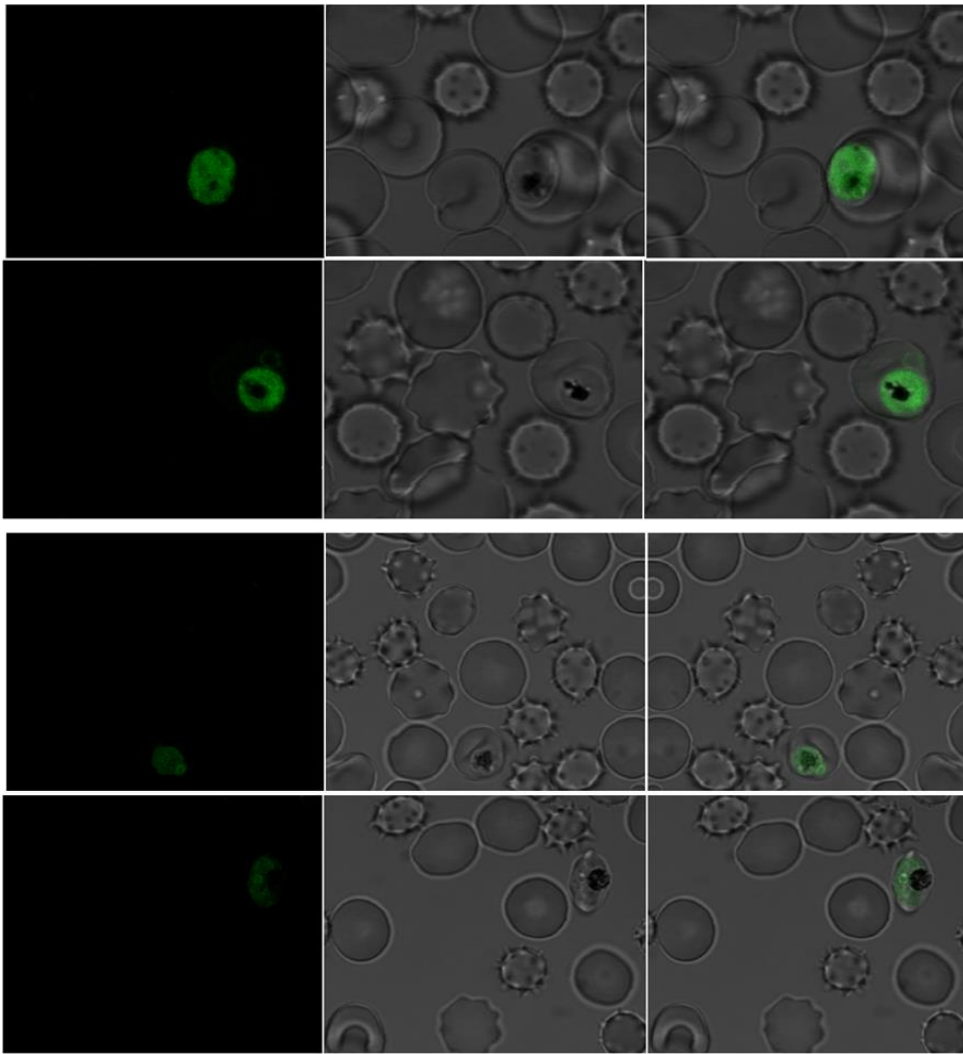

**Supplementary Figure 5. Inhibition of host SphK-1 results in reduced glucose uptake. A)** Evaluation of 2-NBDG uptake in parasite infected erythrocytes following DMS treatment by live-cell imaging. Respective MFI of individual infected erythrocytes were plotted against individual untreated cells.



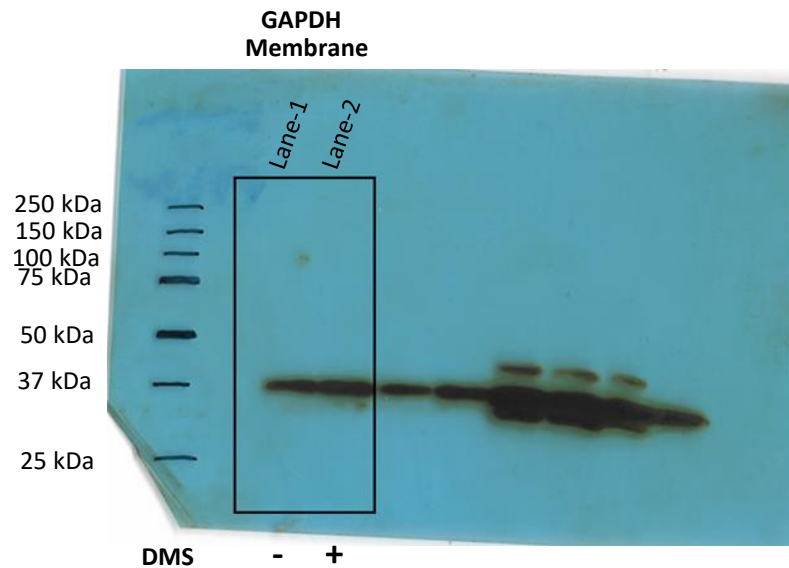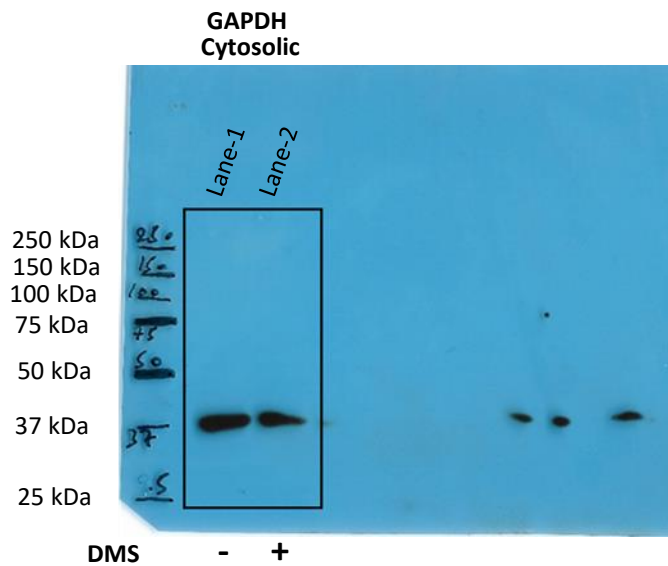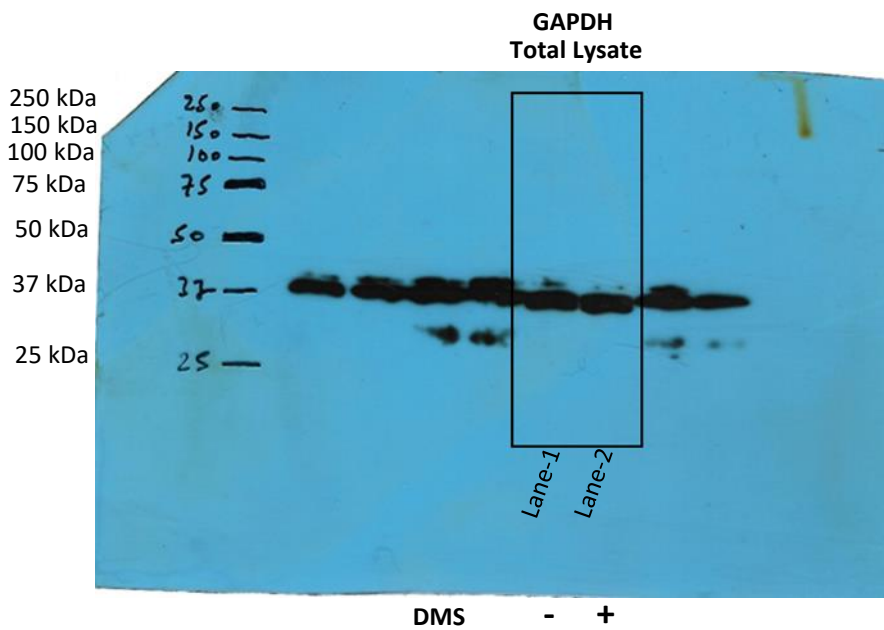

**Supplementary Figure 6. Translocation of GAPDH in parasite infected erythrocytes upon host SphK-1 inhibition.** Detection of GAPDH in both membrane and cytosolic fractions of DMS-treated infected erythrocytes. Total cell lysate was used as a loading control.
